# Supplementary material for: Is the motivation to quit smoking a predictor of abstinence maintenance?
Source: PubMed Central journal article supplement — Tob Prev Cessat. 2021 Jun 29;7:48. doi: 10.18332/tpc/136506 (PMC8240875; doi:10.18332/tpc/136506), 2021-06-29
Supplement: TPC-7-48-s1.pdf [file TPC-7-48-s1.pdf]

**Supplementary Material SM 1. Motivation test used in the study (English and Spanish version).**

**A) RICHMOND TEST**

**English version**

1. Would you like to quit smoking if you could do it easily?

No/Yes

2. Do you really want to quit smoking?

None/A little/Moderately/Very much

3. Do you think that you can quit smoking in the following two weeks?

Definitely No/Maybe/Yes/Definitely Yes

4. Is there a chance that I will be a "Non-smoker" in the next six months?

Definitely No/Maybe/Yes/Definitely Yes

**Spanish version**

1. ¿Le gustaría dejar de fumar si pudiera hacerlo fácilmente?

No/Si

2. ¿Cuánto interés tiene en dejarlo?

Nada/Algo/Bastante/Mucho

3. ¿Intentará dejar de fumar en las próximas 2 semanas?

Definitivamente No/Quizás/Si/Definitivamente Si

4. ¿Cabe la posibilidad de que sea un "No fumador" en los próximos seis meses?

Definitivamente No/Quizás/Si/Definitivamente Si

**B) HENRI MONDOR PARIS MOTIVATION TEST**

**English version**

1. I decided to give up spontaneously. 2 points.

I come to consult for medical indication. 1 point

I come for consultation at the request of my family. 1 point

2. I have already given up for more than a week. 1 point.

3. I don't have any problems at work at the moment. 1 point.

4. I don't have any family problems at the moment. 1 point.

5. I want to free myself from my addiction. 2 points.
6. I do sport or I intend to do sport. 1 point.
7. I want to be in better physical shape. 1 point.
8. I want to look after my physical appearance. 1 point.
9. I am pregnant/my partner is pregnant. 1 point
10. I have small children. 2 points.
11. I am in a good mood at the moment. 2 points.
12. I usually finish what I start. 1 point.
13. I am usually calm and relaxed. 1 point.
14. My weight is usually stable. 1 point.
15. I want to improve my quality of life. 2 points.

**Spanish version**

1. Vengo a consulta espontáneamente, por decisión personal. 2 puntos  
    Vengo a consulta por indicación médica. 1 punto  
    Vengo a consulta por indicación de mi familia. 1 punto
2. Ya he dejado de fumar durante más de una semana. 1 punto.
3. Actualmente mi actividad profesional está sin problemas. 1 punto.
4. Actualmente en el plano familiar todo va bien. 1 punto.
5. Quiero liberarme de esta dependencia. 2 puntos
6. Hago deporte o tengo intención de hacerlo. 1 punto.
7. Voy a estar en mejor forma física. 1 punto.
8. Voy a cuidar mi aspecto físico. 1 punto.
9. Estoy embarazada o mi pareja lo está. 1 punto.
10. Tengo niños de corta edad. 2 puntos
11. Estoy con buena moral actualmente. 2 puntos.
12. Tengo costumbre de lograr lo que emprendo. 1 punto.
13. Soy más bien de temperamento tranquilo. 1 punto
14. Mi peso es habitualmente estable. 1 punto.
15. Voy a acceder a una calidad de vida mejor. 2 puntos

### C) KHIMJI-WATTS TEST

#### English version

1. Is it important for you to quit smoking?

Very important/ Considerably important/ Little or nothing important

2. What influence have others had on that decision?

Weak or none/Moderate/Large

3. What chance of success would you give yourself if you tried to quit?

Large/Moderate/doubtful

#### Spanish Version

1. ¿Es importante para usted dejar de fumar?

Muy importante/ Bastante importante/ Poco o nada importante

2. ¿Qué influencia han tenido los demás sobre esa decisión?

Débil o nula/ Media/ Grande

3. ¿Qué probabilidades de éxito se concedería usted si intentara dejarlo?

Grandes/Medias/Dudosas

### D) VISUAL ANALOGUE SCALE

#### English Versión

Indicate on this scale what is your degree of motivation to quit smoking, assuming that 0 corresponds to a total absence of motivation and 10 to feeling fully motivated

.....  
0    1    2    3    4    5    6    7    8    9    10

#### Spanish Version

Señale en esta escala cuál es su grado de motivación para dejar de fumar, suponiendo que 0 se corresponde con ausencia total de motivación y 10 con sentirse plenamente motivado.

.....  
0    1    2    3    4    5    6    7    8    9    10

## Supplementary Material 2 SM2. STROBE Statement—checklist of items that should be included in reports of observational studies

### STROBE (Strengthening The Reporting of OBservational Studies in Epidemiology) Checklist

A checklist of items that should be included in reports of observational studies. You must report the page number in your manuscript where you consider each of the items listed in this checklist. If you have not included this information, either revise your manuscript accordingly before submitting or note N/A.

**Note:** An Explanation and Elaboration article discusses each checklist item and gives methodological background and published examples of transparent reporting. The STROBE checklist is best used in conjunction with this article (freely available on the Web sites of PLoS Medicine at <http://www.plosmedicine.org/>, Annals of Internal Medicine at <http://www.annals.org/>, and Epidemiology at <http://www.epidem.com/>). Information on the STROBE Initiative is available at [www.strobe-statement.org](http://www.strobe-statement.org).

| Section and Item     | Item No. | Recommendation                                                                                                                                                                             | Reported on Page No. |
|----------------------|----------|--------------------------------------------------------------------------------------------------------------------------------------------------------------------------------------------|----------------------|
| Title and Abstract   | 1        | (a) Indicate the study's design with a commonly used term in the title or the abstract                                                                                                     | 1                    |
|                      |          | (b) Provide in the abstract an informative and balanced summary of what was done and what was found                                                                                        | 1                    |
| <b>Introduction</b>  |          |                                                                                                                                                                                            |                      |
| Background/Rationale | 2        | Explain the scientific background and rationale for the investigation being reported                                                                                                       | 2-3                  |
| Objectives           | 3        | State specific objectives, including any prespecified hypotheses                                                                                                                           | 2-3                  |
| <b>Methods</b>       |          |                                                                                                                                                                                            |                      |
| Study Design         | 4        | Present key elements of study design early in the paper                                                                                                                                    | 3                    |
| Setting              | 5        | Describe the setting, locations, and relevant dates, including periods of recruitment, exposure, follow-up, and data collection                                                            | 3-4                  |
| Participants         | 6        | (a) <i>Cohort study</i> —Give the eligibility criteria, and the sources and methods of selection of participants. Describe methods of follow-up                                            | 3                    |
|                      |          | <i>Case-control study</i> —Give the eligibility criteria, and the sources and methods of case ascertainment and control selection. Give the rationale for the choice of cases and controls |                      |
|                      |          | <i>Cross-sectional study</i> —Give the eligibility criteria, and the sources and methods of selection of participants                                                                      |                      |
|                      |          | (b) <i>Cohort study</i> —For matched studies, give matching criteria and number of exposed and unexposed                                                                                   |                      |
|                      |          | <i>Case-control study</i> —For matched studies, give matching criteria and the number of controls per case                                                                                 |                      |
| Variables            | 7        | Clearly define all outcomes, exposures, predictors, potential confounders, and effect modifiers. Give diagnostic criteria, if applicable                                                   | 3-4                  |

Continue on the next page

| Section and Item             | Item No. | Recommendation                                                                                                                                                                                    | Reported on Page No. |
|------------------------------|----------|---------------------------------------------------------------------------------------------------------------------------------------------------------------------------------------------------|----------------------|
| Data Sources/<br>Measurement | 8*       | For each variable of interest, give sources of data and details of methods of assessment (measurement). Describe comparability of assessment methods if there is more than one group              | 3-4                  |
| Bias                         | 9        | Describe any efforts to address potential sources of bias                                                                                                                                         | 5-6                  |
| Study Size                   | 10       | Explain how the study size was arrived at                                                                                                                                                         | 3                    |
| Quantitative Variables       | 11       | Explain how quantitative variables were handled in the analyses. If applicable, describe which groupings were chosen and why                                                                      | 3                    |
| Statistical Methods          | 12       | (a) Describe all statistical methods, including those used to control for confounding                                                                                                             | 4-6                  |
|                              |          | (b) Describe any methods used to examine subgroups and interactions                                                                                                                               | 4-6                  |
|                              |          | (c) Explain how missing data were addressed                                                                                                                                                       | 6                    |
|                              |          | (d) <i>Cohort study</i> —If applicable, explain how loss to follow-up was addressed<br><i>Case-control study</i> —If applicable, explain how matching of cases and controls was addressed         | 6                    |
|                              |          | <i>Cross-sectional study</i> —If applicable, describe analytical methods taking account of sampling strategy                                                                                      |                      |
|                              |          | (e) Describe any sensitivity analyses                                                                                                                                                             |                      |
| <b>Results</b>               |          |                                                                                                                                                                                                   |                      |
| Participants                 | 13*      | (a) Report numbers of individuals at each stage of study—eg numbers potentially eligible, examined for eligibility, confirmed eligible, included in the study, completing follow-up, and analysed | 6                    |
|                              |          | (b) Give reasons for non-participation at each stage                                                                                                                                              | 6                    |
|                              |          | (c) Consider use of a flow diagram                                                                                                                                                                | Fig. 1               |
| Descriptive Data             | 14*      | (a) Give characteristics of study participants (eg demographic, clinical, social) and information on exposures and potential confounders                                                          | 6                    |
|                              |          | (b) Indicate number of participants with missing data for each variable of interest                                                                                                               | 6                    |
|                              |          | (c) <i>Cohort study</i> —Summarise follow-up time (eg, average and total amount)                                                                                                                  |                      |
| Outcome Data                 | 15*      | <i>Cohort study</i> —Report numbers of outcome events or summary measures over time                                                                                                               | 7-8                  |
|                              |          | <i>Case-control study</i> —Report numbers in each exposure category, or summary measures of exposure                                                                                              |                      |
|                              |          | <i>Cross-sectional study</i> —Report numbers of outcome events or summary measures                                                                                                                |                      |

Continue on the next page

| Section and Item         | Item No. | Recommendation                                                                                                                                                                                               | Reported on Page No. |
|--------------------------|----------|--------------------------------------------------------------------------------------------------------------------------------------------------------------------------------------------------------------|----------------------|
| Main Results             | 16       | (a) Give unadjusted estimates and, if applicable, confounder-adjusted estimates and their precision (eg, 95% confidence interval). Make clear which confounders were adjusted for and why they were included | 7-8                  |
|                          |          | (b) Report category boundaries when continuous variables were categorized                                                                                                                                    |                      |
|                          |          | (c) If relevant, consider translating estimates of relative risk into absolute risk for a meaningful time period                                                                                             |                      |
| Other Analyses           | 17       | Report other analyses done—eg analyses of subgroups and interactions, and sensitivity analyses                                                                                                               | 7-8                  |
| <b>Discussion</b>        |          |                                                                                                                                                                                                              |                      |
| Key Results              | 18       | Summarise key results with reference to study objectives                                                                                                                                                     | 8-11                 |
| Limitations              | 19       | Discuss limitations of the study, taking into account sources of potential bias or imprecision. Discuss both direction and magnitude of any potential bias                                                   | 10-11                |
| Interpretation           | 20       | Give a cautious overall interpretation of results considering objectives, limitations, multiplicity of analyses, results from similar studies, and other relevant evidence                                   | 11                   |
| Generalisability         | 21       | Discuss the generalisability (external validity) of the study results                                                                                                                                        | 11                   |
| <b>Other Information</b> |          |                                                                                                                                                                                                              |                      |
| Funding                  | 22       | Give the source of funding and the role of the funders for the present study and, if applicable, for the original study on which the present article is based                                                | 16                   |

\*Give information separately for cases and controls in case-control studies and, if applicable, for exposed and unexposed groups in cohort and cross-sectional studies.

**Supplementary Material SM3. Frequency distribution of qualitative variables: total sample and by sex, and comparison between sexes.**

| Variable                                       | N (%)      | Sex        |             | Significance | Diff. Proportions (SE)<br>(CI95%) |
|------------------------------------------------|------------|------------|-------------|--------------|-----------------------------------|
|                                                |            | Males (%)  | Females (%) |              |                                   |
| <b>Referred by (N=268):</b>                    |            |            |             | 0.068        |                                   |
| <b>Primary care</b>                            | 80 (29.9)  | 32 (25.8)  | 48 (33.3)   |              |                                   |
| <b>Other specialists</b>                       | 118 (44.0) | 64 (51.6)  | 54 (37.5)   |              |                                   |
| <b>Own will</b>                                | 70 (26.1)  | 28 (22.6)  | 42 (29.2)   |              |                                   |
| <b>Level of studies (N=269)</b>                |            |            |             | 0.288        |                                   |
| <b>Basic</b>                                   | 74 (27.5)  | 38 (30.9)  | 36 (24.7)   |              |                                   |
| <b>Secondary</b>                               | 113 (42.0) | 53 (43.1)  | 60 (41.1)   |              |                                   |
| <b>University</b>                              | 82 (30.5)  | 32 (26.0)  | 50 (34.2)   |              |                                   |
| <b>Quit smoking reasons:</b>                   |            |            |             |              |                                   |
| <b>Health/prevention (N=272)</b>               |            |            |             | 0.961        |                                   |
| <b>No</b>                                      | 22 (8.1)   | 10 (8)     | 12 (8.2)    |              |                                   |
| <b>Yes</b>                                     | 250 (91.9) | 115 (92.0) | 135 (91.8)  |              |                                   |
| <b>Health/Decrease in symptom (N=271)</b>      |            |            |             | 0.019        |                                   |
| <b>No</b>                                      | 92 (33.9)  | 33 (26.6)  | 59 (40.1)   |              |                                   |
| <b>Yes</b>                                     | 179 (66.1) | 91 (73.4)  | 88 (59.9)   | 0.017        | 13.52 (0.06) (1.68 to 25.37)      |
| <b>Stop being dependent (N=272)</b>            |            |            |             | 0.819        |                                   |
| <b>No</b>                                      | 122 (44.9) | 57 (45.6)  | 65 (44.2)   |              |                                   |
| <b>Yes</b>                                     | 150 (55.1) | 68 (54.4)  | 82 (55.8)   |              |                                   |
| <b>Saving money (N=272)</b>                    |            |            |             | 0.571        |                                   |
| <b>No</b>                                      | 153 (56.3) | 68 (54.4)  | 85 (57.8)   |              |                                   |
| <b>Yes</b>                                     | 119 (43.8) | 57 (45.6)  | 62 (42.2)   |              |                                   |
| <b>Quality of life (N=272)</b>                 |            |            |             | 0.137        |                                   |
| <b>No</b>                                      | 111 (40.8) | 45 (36.0)  | 66 (44.9)   |              |                                   |
| <b>Yes</b>                                     | 161 (59.2) | 80 (64.0)  | 81 (55.1)   |              |                                   |
| <b>Do not harm my children/partner (N=272)</b> |            |            |             | 0.111        |                                   |
| <b>No</b>                                      | 181 (66.5) | 77 (61.6)  | 104 (70.7)  |              |                                   |
| <b>Yes</b>                                     | 91 (33.5)  | 48 (38.4)  | 43 (29.3)   |              |                                   |
| <b>Be a good example (N=267)</b>               |            |            |             | 0.229        |                                   |
| <b>No</b>                                      | 180 (67.4) | 79 (63.7)  | 101 (70.6)  |              |                                   |
| <b>Yes</b>                                     | 87 (32.6)  | 45 (36.3)  | 42 (28.4)   |              |                                   |
| <b>Smoke/Smoked father (N=268)</b>             |            |            |             | 0.637        |                                   |
| <b>No</b>                                      | 60 (22.4)  | 25 (20)    | 35 (24.5)   |              |                                   |
| <b>Yes</b>                                     | 203 (75.7) | 98 (78.4)  | 195 (72.4)  |              |                                   |
| <b>Do not know</b>                             | 5 (1.9)    | 2 (1.6)    | 3 (2.1)     |              |                                   |
| <b>Smoke/Smoked mother (N=267)</b>             |            |            |             | 0.514        |                                   |
| <b>No</b>                                      | 209 (78.3) | 97 (78.9)  | 112 (77.8)  |              |                                   |
| <b>Yes</b>                                     | 52 (19.5)  | 22 (17.9)  | 30 (20.8)   |              |                                   |
| <b>Do not know</b>                             | 6 (2.2)    | 4 (3.3)    | 2 (1.4)     |              |                                   |

**SM 3 (cont.): Frequency distribution of qualitative variables: total sample and by sex, and comparison between sexes.**

| Variable                                                   | N (%)       | Sex        |             | Significance | Diff. in proportions (SE)<br>(CI95%) |
|------------------------------------------------------------|-------------|------------|-------------|--------------|--------------------------------------|
|                                                            |             | Males (%)  | Females (%) |              |                                      |
| <b>Smoke/Smoked older brother (N=258)</b>                  |             |            |             | 0.090        |                                      |
| <b>No</b>                                                  | 84 (32.6)   | 42 (35.3)  | 42 (30.2)   |              |                                      |
| <b>Yes</b>                                                 | 125 (48.4)  | 49 (41.2)  | 76 (54.7)   |              |                                      |
| <b>Do not know</b>                                         | 5 (1.9)     | 4 (3.4)    | 1 (0.7)     |              |                                      |
| <b>Not applicable</b>                                      | 44 (17.1)   | 24 (20.2)  | 20 (14.4)   |              |                                      |
| <b>Other brothers smoke (N=265)</b>                        |             |            |             | 0.898        |                                      |
| <b>They do not smoke in the majority</b>                   | 100 (37.7)  | 48 (39.3)  | 52 (36.4)   |              |                                      |
| <b>They smoke in the majority</b>                          | 94 (35.5)   | 42 (34.4)  | 52 (36.4)   |              |                                      |
| <b>There are the same number of smokers as non-smokers</b> | 35 (13.2)   | 17 (13.9)  | 18 (12.6)   |              |                                      |
| <b>Not applicable</b>                                      | 36 (13.6)   | 15 (12.3)  | 21 (14.7)   |              |                                      |
| <b>Friends smoke (N=262)</b>                               |             |            |             | 0.630        |                                      |
| <b>They do not smoke in the majority</b>                   | 91 (34.7)   | 39 (32.2)  | 52 (36.9)   |              |                                      |
| <b>They smoke in the majority</b>                          | 109 (41.6)  | 54 (44.6)  | 55 (39)     |              |                                      |
| <b>There are the same number of smokers as non-smokers</b> | 62 (23.7)   | 28 (23.1)  | 34 (24.1)   |              |                                      |
| <b>Co-workers smoke (N=226)</b>                            |             |            |             | 0.680        |                                      |
| <b>They do not smoke in the majority</b>                   | 109 (48.2)  | 50 (46.7)  | 59 (49.6)   |              |                                      |
| <b>They smoke in the majority</b>                          | 76 (33.6)   | 39 (36.4)  | 37 (31.1)   |              |                                      |
| <b>There are the same number of smokers as non-smokers</b> | 41 (18.1)   | 18 (16.8)  | 23 (19.3)   |              |                                      |
| <b>COPD (N=269)</b>                                        |             |            |             | 0.001        |                                      |
| <b>No</b>                                                  | 177 (65.8%) | 68 (55.3)  | 109 (74.7)  | <0.001       | 19.37 (0.06) (7.35 to 31.37)         |
| <b>Yes</b>                                                 | 62 (23.0)   | 41 (33.3)  | 21 (14.4)   | <0.001       | 18.95 (0.05) (8.11 to 29.79)         |
| <b>Do not know</b>                                         | 30 (11.2)   | 14 (11.4)  | 16 (11)     | 0.913        |                                      |
| <b>Asthma (N=270)</b>                                      |             |            |             | 0.308        |                                      |
| <b>No</b>                                                  | 250 (92.6)  | 117 (94.4) | 133 (91.1)  |              |                                      |
| <b>Yes</b>                                                 | 20 (7.4)    | 7 (5.6)    | 13 (8.9)    |              |                                      |
| <b>Diabetes mellitus (N=266)</b>                           |             |            |             | 0.074        |                                      |
| <b>No</b>                                                  | 246 (92.5)  | 109 (89.3) | 137 (95.1)  |              |                                      |
| <b>Yes</b>                                                 | 20 (7.5)    | 13 (10.7)  | 7 (4.9)     |              |                                      |
| <b>Arterial hypertension (N=270)</b>                       |             |            |             | 0.152        |                                      |
| <b>No</b>                                                  | 217 (80.4)  | 95 (76.6)  | 122 (83.6)  |              |                                      |
| <b>Yes</b>                                                 | 53 (19.6)   | 29 (23.4)  | 24 (16.4)   |              |                                      |
| <b>Ischemic heart disease (N=270)</b>                      |             |            |             | 0.068        |                                      |
| <b>No</b>                                                  | 252 (93.3)  | 112 (90.3) | 140 (95.9)  |              |                                      |
| <b>Yes</b>                                                 | 18 (6.7)    | 12 (9.7)   | 6 (4.1)     |              |                                      |



**SM 3 (cont.): Frequency distribution of qualitative variables: total sample and by sex, and comparison between sexes.**

| Variable                                                    | N (%)      | Sex        |             | Significance | Diff. in proportions (SE)<br>(CI95%) |
|-------------------------------------------------------------|------------|------------|-------------|--------------|--------------------------------------|
|                                                             |            | Males (%)  | Females (%) |              |                                      |
| <b>Lung cancer (N=265)</b>                                  |            |            |             | 0.004        |                                      |
| <b>No</b>                                                   | 258 (97.4) | 115 (94.7) | 143 (100)   |              |                                      |
| <b>Yes</b>                                                  | 7 (2.6)    | 7 (5.7)    | 0 (0.0)     | 0.006        | 5.74 (0.02) (0.85 to 10.62)          |
| <b>Bladder cancer (N=270)</b>                               |            |            |             | 1.000        |                                      |
| <b>No</b>                                                   | 269 (99.6) | 124 (100)  | 145 (99.3)  |              |                                      |
| <b>Yes</b>                                                  | 1 (0.4)    | 0 (0.0)    | 1 (0.7)     |              |                                      |
| <b>Cerebral stroke (N=270)</b>                              |            |            |             | 0.459        |                                      |
| <b>No</b>                                                   | 269 (99.6) | 123 (99.2) | 146 (100.0) |              |                                      |
| <b>Yes</b>                                                  | 1 (0.4)    | 1 (0.8)    | 0 (0.0)     |              |                                      |
| <b>Depression (N=269)</b>                                   |            |            |             | 0.044        |                                      |
| <b>No</b>                                                   | 223 (82.9) | 109 (87.9) | 114 (78.6)  |              |                                      |
| <b>Yes</b>                                                  | 46 (17.1)  | 15 (12.1)  | 31 (21.4)   | 0.039        | 9.28 (0.04) (0.27 to 18.83)          |
| <b>Anxiety (N=270)</b>                                      |            |            |             | 0.008        |                                      |
| <b>No</b>                                                   | 199 (73.7) | 101 (81.5) | 98 (67.1)   |              |                                      |
| <b>Yes</b>                                                  | 71 (26.3)  | 23 (18.5)  | 48 (32.9)   | 0.006        | 14.3 (0.05) (3.34 to 25.31)          |
| <b>Cigarettes consumption per day? (N=273)</b>              |            |            |             | 0.227        |                                      |
| <b>≤ 10</b>                                                 | 25 (9.2)   | 10 (7.9)   | 15 (10.2)   |              |                                      |
| <b>Between 11 and 20</b>                                    | 164 (60.1) | 70 (55.6)  | 94 (63.9)   |              |                                      |
| <b>Between 21 and 30</b>                                    | 49 (17.9)  | 25 (19.8)  | 24 (16.3)   |              |                                      |
| <b>&gt; 30</b>                                              | 35 (12.8)  | 21 (16.7)  | 14 (9.5)    |              |                                      |
| <b>Pharmacological treatment (N=263)</b>                    |            |            |             | 0.258        |                                      |
| <b>No</b>                                                   | 35 (13.3)  | 13 (10.7)  | 22 (15.5)   |              |                                      |
| <b>Yes</b>                                                  | 228 (86.7) | 108 (89.3) | 120 (84.5)  |              |                                      |
| <b>Psychological treatment (N=261)</b>                      |            |            |             | 0.797        |                                      |
| <b>No</b>                                                   | 76 (29.1)  | 34 (28.3)  | 42 (29.8)   |              |                                      |
| <b>Yes</b>                                                  | 185 (70.9) | 86 (71.7)  | 99 (70.2)   |              |                                      |
| <b>Pharmacological and Psychological treatments (N=261)</b> |            |            |             | 0.757        |                                      |
| <b>No</b>                                                   | 83 (31.8)  | 37 (30.8)  | 46 (32.6)   |              |                                      |
| <b>Yes</b>                                                  | 178 (68.2) | 83 (69.2)  | 95 (67.4)   |              |                                      |
| <b>Pharmacological/Psychological treatment type (N=261)</b> |            |            |             | 0.669        |                                      |
| <b>No treatment</b>                                         | 28 (10.7)  | 10 (8.3)   | 18 (12.8)   |              |                                      |
| <b>Pharmacological treatment only</b>                       | 48 (18.4)  | 24 (20)    | 24 (17.0)   |              |                                      |
| <b>Psychological treatment only</b>                         | 7 (2.7)    | 3 (2.5)    | 4 (2.8)     |              |                                      |
| <b>Both treatments together</b>                             | 178 (68.2) | 83 (69.2)  | 95 (67.4)   |              |                                      |

**SM 3 (cont.): Frequency distribution of qualitative variables: total sample and by sex, and comparison between sexes.**

| Variable                                       | N (%)      | Sex        |             | Significance | Diff. in proportions (SE)<br>(CI95%) |
|------------------------------------------------|------------|------------|-------------|--------------|--------------------------------------|
|                                                |            | Males (%)  | Females (%) |              |                                      |
| <b>NRT (N=261)</b>                             |            |            |             | 0.749        |                                      |
| <b>No</b>                                      | 173 (66.3) | 77 (65.3)  | 96 (67.1)   |              |                                      |
| <b>Yes</b>                                     | 88 (33.7)  | 41 (34.7)  | 47 (32.9)   |              |                                      |
| <b>Nicotine patches (N=261)</b>                |            |            |             | 0.986        |                                      |
| <b>No</b>                                      | 210 (80.5) | 95 (80.5)  | 115 (80.4)  |              |                                      |
| <b>Yes</b>                                     | 51 (19.5)  | 23 (19.5)  | 28 (19.6)   |              |                                      |
| <b>Nicotine chewing gums (N=261)</b>           |            |            |             | 0.972        |                                      |
| <b>No</b>                                      | 217 (83.1) | 98 (83.1)  | 119 (83.2)  |              |                                      |
| <b>Yes</b>                                     | 44 (16.9)  | 20 (16.9)  | 24 (16.8)   |              |                                      |
| <b>Nicotine tablet (N=261)</b>                 |            |            |             | 0.254        |                                      |
| <b>No</b>                                      | 240 (92.0) | 111 (94.1) | 129 (90.2)  |              |                                      |
| <b>Yes</b>                                     | 21 (8.0)   | 7 (5.9)    | 14 (9.8)    |              |                                      |
| <b>Nicotine oral spray (N=261)</b>             |            |            |             | 0.984        |                                      |
| <b>No</b>                                      | 241 (92.3) | 109 (92.4) | 132 (92.3)  |              |                                      |
| <b>Yes</b>                                     | 20 (7.7)   | 9 (7.6)    | 11 (7.7)    |              |                                      |
| <b>NRT combinations</b>                        |            |            |             |              |                                      |
| <b>Patches + gums (N=261)</b>                  |            |            |             | 0.946        |                                      |
| <b>No</b>                                      | 243 (93.1) | 110 (93.2) | 133 (93.0)  |              |                                      |
| <b>Yes</b>                                     | 18 (6.9)   | 8 (6.8)    | 10 (7.0)    |              |                                      |
| <b>Patches + Tablet (N=261)</b>                |            |            |             | 0.247        |                                      |
| <b>No</b>                                      | 245 (93.9) | 113 (95.8) | 132 (92.3)  |              |                                      |
| <b>Yes</b>                                     | 16 (6.1)   | 5 (4.2)    | 11 (7.7)    |              |                                      |
| <b>Patches + Oral spray (N=261)</b>            |            |            |             | 0.801        |                                      |
| <b>No</b>                                      | 249 (95.4) | 113 (95.8) | 136 (95.1)  |              |                                      |
| <b>Yes</b>                                     | 12 (4.6)   | 5 (4.2)    | 7 (4.9)     |              |                                      |
| <b>Patches + Gums + Tablet (N=261)</b>         |            |            |             | 0.891        |                                      |
| <b>No</b>                                      | 259 (99.2) | 117 (99.2) | 142 (99.3)  |              |                                      |
| <b>Yes</b>                                     | 2 (0.8)    | 1 (0.8)    | 1 (0.7)     |              |                                      |
| <b>Patches + Gums + spray (N=261)</b>          |            |            |             | 0.503        |                                      |
| <b>No</b>                                      | 259 (99.2) | 118 (100)  | 141 (98.6)  |              |                                      |
| <b>Yes</b>                                     | 2 (0.8)    | 0 (0,0)    | 2 (1.4)     |              |                                      |
| <b>Patches + Gums + Tablet + spray (N=261)</b> |            |            |             | -            |                                      |
| <b>No</b>                                      | 261 (100)  | 118 (45.2) | 143 (54.8)  |              |                                      |
| <b>Yes</b>                                     |            |            |             |              |                                      |
| <b>Patches + any quick NRT (N=261)</b>         |            |            |             | 0.708        |                                      |
| <b>No</b>                                      | 221 (84.7) | 101 (85.6) | 120 (83.9)  |              |                                      |
| <b>Si</b>                                      | 40 (15.3)  | 17 (14.4)  | 23 (16.1)   |              |                                      |

**SM 3 (cont.): Frequency distribution of qualitative variables: total sample and by sex, and comparison between sexes.**

| Variable                                   | N (%)      | Sex        |             | Significance | Diff. in proportions (SE)<br>(CI95%) |
|--------------------------------------------|------------|------------|-------------|--------------|--------------------------------------|
|                                            |            | Males (%)  | Females (%) |              |                                      |
| <b>Number of NRT therapies (N=261)</b>     |            |            |             |              |                                      |
| 0                                          | 173 (66.3) | 77 (65.3)  | 96 (67.1)   | 0.405        |                                      |
| 1                                          | 46 (17.6)  | 24 (20.3)  | 22 (15.4)   |              |                                      |
| 2                                          | 36 (13.8)  | 16 (13.6)  | 20 (14.0)   |              |                                      |
| 3                                          | 6 (2.3)    | 1 (0.8)    | 5 (3.5)     |              |                                      |
| <b>Varenicline (N=261)</b>                 |            |            |             |              |                                      |
| No                                         | 116 (44.4) | 47 (39.8)  | 69 (48.3)   | 0.173        |                                      |
| Yes                                        | 145 (55.6) | 71 (60.2)  | 74 (51.7)   |              |                                      |
| <b>Bupropion (N=260)</b>                   |            |            |             |              |                                      |
| No                                         | 246 (94.6) | 111 (94.9) | 135 (94.4)  | 0.868        |                                      |
| Yes                                        | 14 (5.4)   | 6 (5.1)    | 8 (5.6)     |              |                                      |
| <b>Nortriptyline (N=252)</b>               |            |            |             |              |                                      |
| No                                         | 251 (99.6) | 110 (100)  | 141 (99.3)  | 1.000        |                                      |
| Yes                                        | 1 (0.4)    | 0 (0.0)    | 1 (0.7)     |              |                                      |
| <b>Bupropion + NRT (N=260)</b>             |            |            |             |              |                                      |
| No                                         | 259 (99.6) | 116 (99.1) | 143 (100)   | 0.450        |                                      |
| Yes                                        | 1 (0.4)    | 1 (0.9)    | 0 (0.0)     |              |                                      |
| <b>Varenicline + NRT (N=261)</b>           |            |            |             |              |                                      |
| No                                         | 244 (93.5) | 109 (92.4) | 135 (94.4)  | 0.508        |                                      |
| Yes                                        | 17 (6.5)   | 9 (7.6)    | 8 (5.6)     |              |                                      |
| <b>Varenicline + Bupropion (N=261)</b>     |            |            |             |              |                                      |
| No                                         | 258 (98.9) | 115 (97.5) | 143 (100)   | 0.091        |                                      |
| Yes                                        | 3 (1.1)    | 3 (2.5)    | 0 (0.0)     |              |                                      |
| <b>Varenicline treatment alone (N=261)</b> |            |            |             |              |                                      |
| No                                         | 136 (52.1) | 59 (50)    | 77 (53.8)   | 0.536        |                                      |
| Yes                                        | 125 (47.9) | 59 (50)    | 66 (46.2)   |              |                                      |
| <b>Bupropion treatment alone (N=260)</b>   |            |            |             |              |                                      |
| No                                         | 250 (96.2) | 115 (98.3) | 135 (94.4)  | 0.193        |                                      |
| Yes                                        | 10 (3.8)   | 2 (1.7)    | 8 (5.6)     |              |                                      |
| <b>NRT treatment only (N=260)</b>          |            |            |             |              |                                      |
| No                                         | 191 (73.5) | 87 (74.4)  | 104 (72.7)  | 0.767        |                                      |
| Yes                                        | 69 (26.5)  | 30 (25.6)  | 39 (27.3)   |              |                                      |

**SM 3 (cont.): Frequency distribution of qualitative variables: total sample and by sex, and comparison between sexes.**

| Variable                                                                     | N (%)      | Sex       |             | Significance | Diff. in proportions (SE)<br>(CI95%) |
|------------------------------------------------------------------------------|------------|-----------|-------------|--------------|--------------------------------------|
|                                                                              |            | Males (%) | Females (%) |              |                                      |
| <b>Treatment (N=260)</b>                                                     |            |           |             | 0.212        |                                      |
| <b>Without</b>                                                               | 34 (13.1)  | 13 (11.1) | 21 (14.7)   |              |                                      |
| <b>Varenicline alone</b>                                                     | 125 (48.1) | 59 (50.4) | 66 (46.2)   |              |                                      |
| <b>Bupropion alone</b>                                                       | 10 (3.8)   | 2 (1.7)   | 8 (5.6)     |              |                                      |
| <b>NRT alone</b>                                                             | 69 (26.5)  | 30 (25.6) | 39 (27.3)   |              |                                      |
| <b>Nortriptyline alone</b>                                                   | 1 (0.4)    | 0 (0.0)   | 1 (0.7)     |              |                                      |
| <b>Bupropion + NRT</b>                                                       | 1 (0.4)    | 1 (0.9)   | 0 (0.0)     |              |                                      |
| <b>Varenicline + NRT</b>                                                     | 17 (6.5)   | 9 (7.7)   | 8 (5.6)     |              |                                      |
| <b>Varenicline + Bupropion</b>                                               | 3 (1.2)    | 3 (2.6)   | 0 (0.0)     |              |                                      |
| <b>Treatment: alone vs. combined (N=260)</b>                                 |            |           |             | 0.191        |                                      |
| <b>Without treatment</b>                                                     | 35 (13.5)  | 13 (11.1) | 22 (15.4)   |              |                                      |
| <b>Varenicline/Bupropion/NRT alone</b>                                       | 204 (78.5) | 91 (77.8) | 113 (79.0)  |              |                                      |
| <b>Combined treatments</b>                                                   | 21 (8.1)   | 13 (11.1) | 8 (5.6)     |              |                                      |
| <b>Varenicline alone or combined vs. other treatment vs. without (N=260)</b> |            |           |             | 0.325        |                                      |
| <b>Without treatment</b>                                                     | 35 (13.5)  | 13 (11.1) | 22 (15.4)   |              |                                      |
| <b>Others treatments</b>                                                     | 80 (30.8)  | 33 (28.2) | 47 (32.9)   |              |                                      |
| <b>Treatments with</b>                                                       |            |           |             |              |                                      |
| <b>Varenicline</b>                                                           | 145 (55.8) | 71 (60.7) | 74 (51.7)   |              |                                      |
| <b>Results (N=273)</b>                                                       |            |           |             | 0.736        |                                      |
| <b>Failure</b>                                                               | 127 (46.5) | 60 (47.6) | 67 (45.6)   |              |                                      |
| <b>Success</b>                                                               | 146 (53.5) | 66 (52.4) | 80 (54.4)   |              |                                      |

N: Sample size. Diff: Difference. SE: Standard error. CI95%: Confidence interval at 95% for the difference in proportions. NRT: Nicotine replacement therapy. Cont.: Continuation.

**Supplementary Material SM4. Description of the quantitative variables: Total sample and by sex, and comparison between sexes.**

| Variable                                          | Mean (SD)<br>(N) (Range)             | Sex                                  |                                     | Significance | Mean Differences (SE)<br>(CI 95%) |
|---------------------------------------------------|--------------------------------------|--------------------------------------|-------------------------------------|--------------|-----------------------------------|
|                                                   |                                      | Males<br>Mean (SD)<br>(N) (Range)    | Females<br>Mean (SD)<br>(N) (Range) |              |                                   |
| Age (years)                                       | 51.0 (10.6)<br>(273) (25 to 76)      | 51.3 (10.8)<br>(126) (27 to 75)      | 50.8 (10.6)<br>(147) (25 to 76)     | 0.681        |                                   |
| Age of initiation (years)                         | 16.4 (4.1)<br>(272) (7 to 44)        | 15.8 (3.2)<br>(126) (7 to 27)        | 17 (4.8)<br>(146) (10 a 44)         | 0.023        | 1.1 (0.5)<br>(0.2 to 2.1)         |
| Cigarettes consumption (per/day)                  | 22.7 (10.2)<br>(273) (4 to 60)       | 24 (11.3)<br>(126) (5 to 60)         | 21.6 (9.1)<br>(147) (4 to 60)       | 0.074        |                                   |
| Number of years smoking                           | 34.6 (11.2)<br>(272) (0 to 66)       | 35.5 (11.6)<br>(126) (12 to 66)      | 33.9 (10.8)<br>(146) (0 a 61)       | 0.243        |                                   |
| Cumulative consumption (packs-years)              | 40.3 (24.3)<br>(272) (0 to 141)      | 43.9 (27.3)<br>(126) (4.7 to 141)    | 37.2 (21.1)<br>(146) (0 to 132)     | 0.033        | 6.7 (3.0)<br>(0.5 to 12.9)        |
| Number of previous quit attempts                  | 1.7 (1.6)<br>(273) (0 to 12)         | 1.7 (1.7)<br>(126) (0 to 12)         | 1.7 (1.5)<br>(147) (0 a 10)         | 0.860        |                                   |
| Number of previous quit attempts in the past year | 0.3 (0.6)<br>(273) (0 to 6)          | 0.3 (0.7)<br>(126) (0 a 6)           | 0.2 (0.5)<br>(147) (0 to 3)         | 0.155        |                                   |
| Weight (kg)                                       | 71.6 (16.1)<br>(224) (43 to 155)     | 80.1 (16.5)<br>(105) (43 to 155)     | 64.2 (11.3)<br>(119) (93 to 98)     | <0.001       | 15.9 (1.9)<br>(12.1 to 19.7)      |
| Height (cm)                                       | 164.3 (15.0)<br>(218) (63 to 191)    | 170.3 (15.3)<br>(102) (71 to 191)    | 158.9 (12.5)<br>(116) (63 to 172)   | <0.001       | 11.3 (1.9)<br>(7.6 to 15.1)       |
| Body Mass Index<br>(Kg/m <sup>2</sup> )           | 28.1 (19.6)<br>(218) (16.2 to 217.7) | 30.1 (24.5)<br>(102) (16.2 to 217.7) | 26.4 (13.8)<br>(116) (17.5 to 163)  | 0.172        |                                   |
| Carbon monoxide (ppm)                             | 18.4 (12.9)<br>(208) (0 to 92)       | 18.5 (14.5)<br>(98) (0 a 92)         | 18.4 (11.3)<br>(110) (0 to 60)      | 0.990        |                                   |
| Visual Analog Scale                               | 8 (1.9)<br>(273) (0 to 10)           | 8.2 (1.7)<br>(126) (2 to 10)         | 7.8 (2.1)<br>(147) (3 to 10)        | 0.121        |                                   |
| Richmond test score                               | 7.9 (1.5)<br>(273) (3 to 10)         | 7.9 (1.4)<br>(126) (4 to 10)         | 7.8 (1.6)<br>(147) (3 to 10)        | 0.667        |                                   |
| Henri Mondor Paris motivation test score          | 13 (2.8)<br>(273) (3 to 18)          | 13.1 (2.8)<br>(126) (7 to 18)        | 12.9 (2.7)<br>(147) (3 a 18)        | 0.656        |                                   |
| Khimji-Watts motivation test score                | 11.4 (2.5)<br>(273) (5 to 15)        | 11.3 (2.5)<br>(126) (7 to 15)        | 11.5 (2.5)<br>(147) (5 to 15)       | 0.552        |                                   |
| Fagerström test score                             | 5.9 (2.2)<br>(273) (0 to 10)         | 5.9 (2.3)<br>(126) (0 to 10)         | 5.9 (2.2)<br>(147) (0 to 10)        | 0.977        |                                   |
| Heaviness Smoking Index                           | 3.5 (1.4)<br>(273) (0 a 6)           | 3.6 (1.4)<br>(126) (0 to 6)          | 3.5 (1.3)<br>(147) (0 to 6)         | 0.390        |                                   |
| Follow-up time (months)                           | 6.8 (4.9)<br>(273) (0.2 to 22)       | 6.5 (4.5)<br>(126) (0.2 to 14.5)     | 7.0 (5.3)<br>(147) (0.2 to 22)      | 0.744        |                                   |

SD: Standard deviation. N: Sample size. SE: Standard error. CI 95; Confidence interval at 95% for mean differences

**Supplementary Material SM5. Frequency distribution of qualitative variables as a function of the result variable: total sample.**

| Variable (N)                                   | Result      |             | Significance | Diff. in Proportions (SE) (CI95%) |
|------------------------------------------------|-------------|-------------|--------------|-----------------------------------|
|                                                | Failure (%) | Success (%) |              |                                   |
| <b>Sex (N=273)</b>                             |             |             | 0.736        |                                   |
| <b>Female</b>                                  | 67 (52.8)   | 80 (54.8)   |              |                                   |
| <b>Males</b>                                   | 60 (47.2)   | 66 (45.2)   |              |                                   |
| <b>Referred by (N=268):</b>                    |             |             | 0.378        |                                   |
| <b>Primary Care</b>                            | 32 (25.8)   | 48 (33.3)   |              |                                   |
| <b>Other specialists</b>                       | 59 (47.6)   | 59 (41)     |              |                                   |
| <b>Own will</b>                                | 33 (26.6)   | 37 (25.7)   |              |                                   |
| <b>Level of studies (N=269)</b>                |             |             | 0.011        |                                   |
| <b>Basic</b>                                   | 37 (29.6)   | 37 (25.7)   | 0.475        |                                   |
| <b>Secondary</b>                               | 41 (32.8)   | 72 (50.0)   | 0.004        | 17.2 (0.06) (4.8 to 29.5)         |
| <b>University</b>                              | 47 (37.6)   | 35 (24.3)   | 0.018        | 13.3 (0.06) (1.5 to 25.0)         |
| <b>Quit smoking reasons:</b>                   |             |             |              |                                   |
| <i>Health/prevention (N=272)</i>               |             |             | 0.746        |                                   |
| <b>No</b>                                      | 11 (8.7)    | 11 (7.6)    |              |                                   |
| <b>Yes</b>                                     | 116 (91.3)  | 134 (92.4)  |              |                                   |
| <i>Health/Decrease in symptoms (N=271)</i>     |             |             | 0.587        |                                   |
| <b>No</b>                                      | 41 (32.3)   | 51 (35.4)   |              |                                   |
| <b>Yes</b>                                     | 86 (67.7)   | 93 (64.6)   |              |                                   |
| <i>Stop being dependent (N=272)</i>            |             |             | 0.469        |                                   |
| <b>No</b>                                      | 54 (42.5)   | 68 (46.9)   |              |                                   |
| <b>Yes</b>                                     | 73 (57.5)   | 77 (53.1)   |              |                                   |
| <i>Saving money (N=272)</i>                    |             |             | 0.264        |                                   |
| <b>No</b>                                      | 76 (59.8)   | 77 (53.1)   |              |                                   |
| <b>Si</b>                                      | 51 (40.2)   | 68 (46.9)   |              |                                   |
| <i>Quality of life (N=272)</i>                 |             |             | 0.591        |                                   |
| <b>No</b>                                      | 54 (42.5)   | 57 (39.3)   |              |                                   |
| <b>Yes</b>                                     | 73 (57.5)   | 88 (60.7)   |              |                                   |
| <i>Do not harm my children/partner (N=272)</i> |             |             | 0.369        |                                   |
| <b>No</b>                                      | 88 (69.3)   | 93 (64.1)   |              |                                   |
| <b>yes</b>                                     | 39 (30.7)   | 52 (35.9)   |              |                                   |
| <i>Be a Good example (N=267)</i>               |             |             | 0.809        |                                   |
| <b>No</b>                                      | 82 (66.7)   | 98 (68.1)   |              |                                   |
| <b>Yes</b>                                     | 41 (33.3)   | 46 (31.9)   |              |                                   |
| <b>Smoke/Smoked father (N=268)</b>             |             |             | 0.121        |                                   |
| <b>No</b>                                      | 34 (27.6)   | 26 (17.9)   |              |                                   |
| <b>Yes</b>                                     | 86 (69.9)   | 117 (80.7)  |              |                                   |
| <b>Do not know</b>                             | 3 (2.4)     | 2 (1.4)     |              |                                   |

**SM 5 (cont.). Frequency distribution of qualitative variables as a function of the result variable: total sample.**

| Variable                                            | Result        |               | Significance | Diff. in Proportions (SE) (CI95%) |
|-----------------------------------------------------|---------------|---------------|--------------|-----------------------------------|
|                                                     | Failure N (%) | Success N (%) |              |                                   |
| <b>Smoke/Smoked mother (N=267)</b>                  |               |               | 0.805        |                                   |
| No                                                  | 98 (79.0)     | 111 (77.6)    |              |                                   |
| Yes                                                 | 24 (19.4)     | 28 (19.6)     |              |                                   |
| Do not know                                         | 2 (1.6)       | 4 (2.8)       |              |                                   |
| <b>Smoke/Smoked older brother (N=258)</b>           |               |               | 0.048        |                                   |
| No                                                  | 45 (38.5)     | 39 (27.7)     | 0.066        |                                   |
| Yes                                                 | 56 (47.9)     | 69 (48.9)     | 0.864        |                                   |
| Do not know                                         | 0 (0.0)       | 5 (3.5)       | 0.023        | 3.55 (0.02) (-7.38 to 0.29)       |
| Not applicable                                      | 16 (13.7)     | 28 (19.9)     | 0.181        |                                   |
| <b>Other brothers smoke (N=265)</b>                 |               |               | 0.740        |                                   |
| They do not smoke in the majority                   | 49 (39.8)     | 51 (35.9)     |              |                                   |
| They smoke in the majority                          | 45 (36.6)     | 49 (34.5)     |              |                                   |
| There are the same number of smokers as non-smokers | 14 (11.4)     | 21 (14.8)     |              |                                   |
| Not applicable                                      | 15 (12.2)     | 21 (14.8)     |              |                                   |
| <b>Friends smoke (N=262)</b>                        |               |               | 0.042        |                                   |
| They do not smoke in the majority                   | 36 (29.8)     | 55 (39.0)     | 0.113        |                                   |
| They smoke in the majority                          | 48 (39.7)     | 61 (43.3)     | 0.556        |                                   |
| There are the same number of smokers as non-smokers | 37 (30.6)     | 25 (17.7)     | 0.015        | 12.85 (0.05) (1.73 to 23.97)      |
| <b>Co-workers smoke (N=226)</b>                     |               |               | 0.084        |                                   |
| They do not smoke in the majority                   | 49 (45.4)     | 60 (50.8)     |              |                                   |
| They smoke in the majority                          | 33 (30.6)     | 43 (36.4)     |              |                                   |
| There are the same number of smokers as non-smokers | 26 (24.1)     | 15 (12.7)     |              |                                   |
| <b>COPD (N=269)</b>                                 |               |               | 0.952        |                                   |
| No                                                  | 84 (66.7)     | 93 (65.0)     |              |                                   |
| Yes                                                 | 28 (22.2)     | 34 (23.8)     |              |                                   |
| Do not know                                         | 14 (11.1)     | 16 (11.2)     |              |                                   |
| <b>Asthma (N=270)</b>                               |               |               | 0.877        |                                   |
| No                                                  | 117 (92.9)    | 133 (92.4)    |              |                                   |
| Yes                                                 | 9 (7.1)       | 11 (7.6)      |              |                                   |
| <b>Diabetes mellitus (N=266)</b>                    |               |               | 0.779        |                                   |
| No                                                  | 115 (92)      | 131 (92.9)    |              |                                   |
| Yes                                                 | 10 (8)        | 10 (7.1)      |              |                                   |
| <b>Arterial hypertension (N=270)</b>                |               |               | 0.316        |                                   |
| No                                                  | 98 (77.8)     | 119 (82.6)    |              |                                   |
| Yes                                                 | 28 (22.2)     | 25 (17.4)     |              |                                   |
| <b>Ischemic heart disease (N=270)</b>               |               |               | 0.078        |                                   |
| No                                                  | 114 (90.5)    | 138 (95.8)    |              |                                   |
| Yes                                                 | 12 (9.5)      | 6 (4.2)       |              |                                   |

**SM 5 (cont.). Frequency distribution of qualitative variables as a function of the result variable: total sample.**

| Variable                                                       | Result        |               | Significance | Diff. in Proportions (SE) (CI95%) |
|----------------------------------------------------------------|---------------|---------------|--------------|-----------------------------------|
|                                                                | Failure N (%) | Success N (%) |              |                                   |
| <b>Lung cancer (N=265)</b>                                     |               |               | 0.709        |                                   |
| <b>No</b>                                                      | 120 (96.8)    | 138 (97.9)    |              |                                   |
| <b>Yes</b>                                                     | 4 (3.2)       | 3 (2.1)       |              |                                   |
| <b>Bladder cancer (N=270)</b>                                  |               |               | 0.467        |                                   |
| <b>No</b>                                                      | 125 (99.2)    | 144 (100)     |              |                                   |
| <b>Yes</b>                                                     | 1 (0.8)       | 0 (0.0)       |              |                                   |
| <b>Cerebral stroke (N=270)</b>                                 |               |               | 0.467        |                                   |
| <b>No</b>                                                      | 125 (99.2)    | 144 (100)     |              |                                   |
| <b>Yes</b>                                                     | 1 (0.8)       | 0 (0.0)       |              |                                   |
| <b>Depression (N=269)</b>                                      |               |               | 0.616        |                                   |
| <b>No</b>                                                      | 106 (84.1)    | 117 (81.8)    |              |                                   |
| <b>Yes</b>                                                     | 20 (15.9)     | 26 (18.2)     |              |                                   |
| <b>Anxiety (N=270)</b>                                         |               |               | 0.089        |                                   |
| <b>No</b>                                                      | 99 (78.6)     | 100 (69.4)    |              |                                   |
| <b>Yes</b>                                                     | 27 (21.4)     | 44 (30.6)     |              |                                   |
| <b>Cigarettes consumption per day? (N=273)</b>                 |               |               | 0.442        |                                   |
| <b>≤ 10</b>                                                    | 15 (11.8)     | 10 (6.8)      |              |                                   |
| <b>Between 11 and 20</b>                                       | 71 (55.9)     | 93 (63.7)     |              |                                   |
| <b>Between 21 and 30</b>                                       | 24 (18.9)     | 25 (17.1)     |              |                                   |
| <b>&gt; 30</b>                                                 | 17 (13.4)     | 18 (12.3)     |              |                                   |
| <b>Pharmacological and Psychological treatment type(N=261)</b> |               |               | 0.414        |                                   |
| <b>No treatment</b>                                            | 12 (9.8)      | 16 (11.6)     |              |                                   |
| <b>Pharmacological treatment only</b>                          | 27 (22)       | 21 (15.2)     |              |                                   |
| <b>Psychological treatment only</b>                            | 2 (1.6)       | 5 (3.6)       |              |                                   |
| <b>Both treatments together</b>                                | 82 (66.7)     | 96 (69.6)     |              |                                   |
| <b>NRT treatment (N=261)</b>                                   |               |               | 0.025        |                                   |
| <b>No</b>                                                      | 71 (59.2)     | 102 (72.3)    |              |                                   |
| <b>Yes</b>                                                     | 49 (40.8)     | 39 (27.7)     | 0.024        | 13.17 (5.86) (0.92 to 25.43)      |
| <b>Nicotine Patches (N=261)</b>                                |               |               | 0.082        |                                   |
| <b>No</b>                                                      | 91 (75.8)     | 119 (84.4)    |              |                                   |
| <b>Yes</b>                                                     | 29 (24.2)     | 22 (15.6)     |              |                                   |
| <b>Nicotine gums (N=261)</b>                                   |               |               | 0.459        |                                   |
| <b>No</b>                                                      | 102 (85)      | 115 (81.6)    |              |                                   |
| <b>Yes</b>                                                     | 18 (15)       | 26 (18.4)     |              |                                   |
| <b>Nicotine tablet (N=261)</b>                                 |               |               | 0.127        |                                   |
| <b>No</b>                                                      | 107 (89.2)    | 133 (94.3)    |              |                                   |
| <b>Yes</b>                                                     | 13 (10.8)     | 8 (5.7)       |              |                                   |



**SM 5 (cont.). Frequency distribution of qualitative variables as a function of the result variable: total sample.**

| Variable                                            | Result        |               | Significance | Diff. in Proportions (SE) (CI95%) |
|-----------------------------------------------------|---------------|---------------|--------------|-----------------------------------|
|                                                     | Failure N (%) | Success N (%) |              |                                   |
| <i>Nicotine oral spray</i> (N=261)                  |               |               | 0.190        |                                   |
| No                                                  | 108 (90)      | 133 (94.3)    |              |                                   |
| Yes                                                 | 12 (10)       | 8 (5.7)       |              |                                   |
| <b>NRT combinations</b>                             |               |               |              |                                   |
| <i>Patches + gums</i> (N=261)                       |               |               | 0.036        |                                   |
| No                                                  | 116 (96.7)    | 127 (90.1)    |              |                                   |
| Yes                                                 | 4 (3.3)       | 14 (9.9)      | 0.028        | 6.60 (3.00) (-0.06 to 13.26)      |
| <i>Patches + tablet</i> (N=261)                     |               |               | 0.171        |                                   |
| No                                                  | 110 (91.7)    | 135 (95.7)    |              |                                   |
| Yes                                                 | 10 (8.3)      | 6 (4.3)       |              |                                   |
| <i>Patches + Oral spray</i> (N=261)                 |               |               | 0.141        |                                   |
| No                                                  | 112 (93.3)    | 137 (97.2)    |              |                                   |
| Yes                                                 | 8 (6.7)       | 4 (2.8)       |              |                                   |
| <i>Patches + Gums + Tablet</i> (N=261)              |               |               | 1.000        |                                   |
| No                                                  | 119 (99.2)    | 140 (99.3)    |              |                                   |
| Yes                                                 | 1 (0.8)       | 1 (0.7)       |              |                                   |
| <i>Patches + Gums + Oral spray</i> (N=261)          |               |               | 1.000        |                                   |
| No                                                  | 119 (99.2)    | 140 (99.3)    |              |                                   |
| Yes                                                 | 1 (0.8)       | 1 (0.7)       |              |                                   |
| <i>Patches + Gums + Tablet + Oral spray</i> (N=261) |               |               |              |                                   |
| No                                                  | 120 (100)     | 141 (100)     |              |                                   |
| Si                                                  | -             | -             |              |                                   |
| <i>Patches + Any quick NRT</i> (N=261)              |               |               | 0.834        |                                   |
| No                                                  | 101 (84.2)    | 120 (85.1)    |              |                                   |
| Yes                                                 | 19 (15.8)     | 21 (14.9)     |              |                                   |
| <i>Number of NRT therapies</i> (N=261)              |               |               | 0.067        |                                   |
| 0                                                   | 71 (59.2)     | 102 (72.3)    |              |                                   |
| 1                                                   | 20 (24.2)     | 17 (12.1)     |              |                                   |
| 2                                                   | 17 (14.2)     | 19 (13.5)     |              |                                   |
| 3                                                   | 3 (2.6)       | 3 (2.1)       |              |                                   |
| <b>Varenicline</b> (N=261)                          |               |               | 0.157        |                                   |
| No                                                  | 59 (49.2)     | 57 (40.4)     |              |                                   |
| Yes                                                 | 61 (50.8)     | 84 (59.6)     |              |                                   |
| <b>Bupropion</b> (N=260)                            |               |               | 0.767        |                                   |
| No                                                  | 113 (94.2)    | 133 (95.0)    |              |                                   |
| Yes                                                 | 7 (5.8)       | 7 (5)         |              |                                   |
| <b>Nortriptyline</b> (N=252)                        |               |               | 0.351        |                                   |
| No                                                  | 117 (100)     | 134 (99.3)    |              |                                   |
| Yes                                                 | 0 (0.0)       | 1 (0.7)       |              |                                   |

**SM 5 (cont.). Frequency distribution of qualitative variables as a function of the result variable: total sample.**

| Variable                                                                              | Result        |               | Significance | Diff. in Proportions (SE) (CI95%) |
|---------------------------------------------------------------------------------------|---------------|---------------|--------------|-----------------------------------|
|                                                                                       | Failure N (%) | Success N (%) |              |                                   |
| <b>Bupropion + NRT (N=260)</b>                                                        |               |               | 1.000        |                                   |
| No                                                                                    | 120 (100)     | 139 (99.3)    |              |                                   |
| Yes                                                                                   | 0 (0.0)       | 1 (0.7)       |              |                                   |
| <b>Varenicline + NRT (N=261)</b>                                                      |               |               | 0.926        |                                   |
| No                                                                                    | 112 (93.3)    | 132 (93.6)    |              |                                   |
| Yes                                                                                   | 8 (6.7)       | 9 (6.4)       |              |                                   |
| <b>Varenicline + Bupropion (N=261)</b>                                                |               |               | 0.470        |                                   |
| No                                                                                    | 118 (98.3)    | 140 (99.3)    |              |                                   |
| Yes                                                                                   | 2 (1.7)       | 1 (0.7)       |              |                                   |
| <b>Varenicline treatment alone (N=261)</b>                                            |               |               | 0.108        |                                   |
| No                                                                                    | 69 (57.5)     | 67 (47.5)     |              |                                   |
| Yes                                                                                   | 51 (42.5)     | 74 (52.5)     |              |                                   |
| <b>Bupropion treatment alone (N=260)</b>                                              |               |               | 1.000        |                                   |
| No                                                                                    | 115 (95.8)    | 135 (96.4)    |              |                                   |
| Yes                                                                                   | 5 (4.2)       | 5 (3.6)       |              |                                   |
| <b>NRT treatment alone (N=260)</b>                                                    |               |               | 0.010        |                                   |
| No                                                                                    | 79 (65.8)     | 112 (80)      |              |                                   |
| Yes                                                                                   | 41 (34.2)     | 28 (20)       | 0.010        | 14.17 (5.49) (2.63 to 25.71)      |
| <b>Treatment (N=260)</b>                                                              |               |               | 0.258        |                                   |
| <b>Without treatment</b>                                                              | 14 (11.6)     | 20 (14.4)     |              |                                   |
| <b>Varenicline alone</b>                                                              | 51 (42.1)     | 74 (53.2)     |              |                                   |
| <b>Bupropion alone</b>                                                                | 5 (4.1)       | 5 (3.6)       |              |                                   |
| <b>NRT alone</b>                                                                      | 41 (33.9)     | 28 (20.1)     |              |                                   |
| <b>Nortriptyline</b>                                                                  | 0 (0.0)       | 1 (0.7)       |              |                                   |
| <b>Bupropion + NRT</b>                                                                | 0 (0.0)       | 1 (0.7)       |              |                                   |
| <b>Varenicline + NRT</b>                                                              | 8 (6.6)       | 9 (6.5)       |              |                                   |
| <b>Varenicline + Bupropion</b>                                                        | 2 (1.7)       | 1 (0.7)       |              |                                   |
| <b>Treatment: alone vs. combined (N=260)</b>                                          |               |               | 0.706        |                                   |
| <b>Without treatment</b>                                                              | 14 (11.6)     | 21 (15.1)     |              |                                   |
| <b>Varenicline, Bupropion or NRT alones</b>                                           | 97 (80.2)     | 107 (77)      |              |                                   |
| <b>Combined treatment</b>                                                             | 10 (8.3)      | 11 (7.9)      |              |                                   |
| <b>Varenicline combined or alone vs others treatment vs without treatment (N=260)</b> |               |               | 0.060        |                                   |
| <b>Without treatment</b>                                                              | 14 (11.6)     | 21 (15.1)     | 0.400        |                                   |
| <b>Others treatment</b>                                                               | 46 (38)       | 34 (24.5)     | 0.018        | 13.56 (0.06) (1.56 to 23.55)      |
| <b>Tretaments with varenicline</b>                                                    | 61 (50.4)     | 84 (60.4)     | 0.103        |                                   |

N: Sample size. COPD: Chronic obstructive pulmonary disease. Diff: Difference. SE: Standard error. CI95%: Confidence interval at 95% for the difference in proportions. NRT: Nicotine replacement therapy

**Supplementary Material SM6. Description of the quantitative variables according to the result variable: total sample.**

| Variable                                          | Result                               |                                      | Significance | Mean Differences (SE)<br>(CI 95%) |
|---------------------------------------------------|--------------------------------------|--------------------------------------|--------------|-----------------------------------|
|                                                   | Failure<br>Mean (SD)<br>(N) (Range)  | Success<br>Mean (SD)<br>(N) (Range)  |              |                                   |
| Age (years)                                       | 50.0 (10.5)<br>(127) (25 to 75)      | 51.5 (10.8)<br>(146) (25 to 76)      | 0.460        |                                   |
| Age of initiation (years)                         | 16.5 (4.7)<br>(126) (4 to 60)        | 16.4 (3.6)<br>(146) (5 to 60)        | 0.933        |                                   |
| Cigarettes consumption (per/day)                  | 22.6 (10.9)<br>(127) (4 to 60)       | 22.8 (9.6)<br>(146) (5 to 60)        | 0.898        |                                   |
| Number of years smoking                           | 34.1 (11.2)<br>(126) (0 to 66)       | 35.0 (11.2)<br>(146) (11 to 61)      | 0.509        |                                   |
| Cumulative consumption (packs-years)              | 39.9 (25.8)<br>(126) (0 to 141)      | 40.6 (23.1)<br>(146) (4.2 to 132)    | 0.810        |                                   |
| Number of previous quit attempts                  | 1.7 (1.5)<br>(127) (0 to 10)         | 1.7 (1.7)<br>(146) (0 to 12)         | 0.750        |                                   |
| Number of previous quit attempts in the past year | 0.2 (0.5)<br>(127) (0 to 10)         | 0.3 (0.7)<br>(146) (0 to 6)          | 0.198        |                                   |
| Weight (kg)                                       | 72.7 (16.5)<br>(106) (43 to 155)     | 70.7 (15.7)<br>(118) (43 to 131)     | 0.349        |                                   |
| Height (cm)                                       | 164.7 (14.1)<br>(102) (73 to 191)    | 163.9 (15.8)<br>(116) (63 to 186)    | 0.696        |                                   |
| Body Mass Index(kg/m <sup>2</sup> )               | 28.2 (19.9)<br>(102) (17.9 to 217.7) | 28.1 (19.4)<br>(116) (16.2 to 176.5) | 0.949        |                                   |
| Carbon Monoxide (ppm)                             | 17.2 (12.6)<br>(99) (0 to 92)        | 19.5 (13.1)<br>(109) (0 to 77)       | 0.228        |                                   |
| Visual Analogue Scale                             | 7.9 (1.9)<br>(127) (0 to 10)         | 8.01 (1.9)<br>(146) (0 to 10)        | 0.559        |                                   |
| Richmond Test Score                               | 7.9 (1.5)<br>(127) (3 to 10)         | 7.8 (1.6)<br>(146) (4 to 10)         | 0.732        |                                   |
| Henri Mondor Paris Motivation Test Score          | 12.8 (3.0)<br>(127) (3 to 18)        | 13.2 (2.5)<br>(146) (6 to 18)        | 0.190        |                                   |
| Khimji-Watts Motivation Test Score                | 11.3 (2.7)<br>(127) (5 to 15)        | 11.5 (2.4)<br>(146) (5 to 15)        | 0.603        |                                   |
| Fagerström Test Score                             | 5.9 (2.4)<br>(127) (0 to 10)         | 6.0 (2.1)<br>(146) (0 to 10)         | 0.683        |                                   |
| Heaviness of Smoking Index Test Score             | 3.5 (1.5)<br>(127) (0 to 6)          | 3.6 (1.3)<br>(146) (0 to 6)          | 0.544        |                                   |
| Follow-up time (months)                           | 3.4 (3.6)<br>(127) (0.2 a 14.3)      | 9.7 (4.0)<br>(146) (0.2 to 22.0)     | <0.001       | 6.2 (0.5) (5,3 to 7,1)            |

SD: Standard deviation. N: Sample size. SE: Standard error. CI 95%: Confidence interval at 95% for mean differences.
